# Supplementary material for: Calorie Restriction Provides Kidney Ischemic Tolerance in Senescence-Accelerated OXYS Rats
Source: MDPI journal article supplement (doi:10.3390/ijms232315224), 2022-12-03
Supplement: s1 [file s1]

## Supplementary Figures

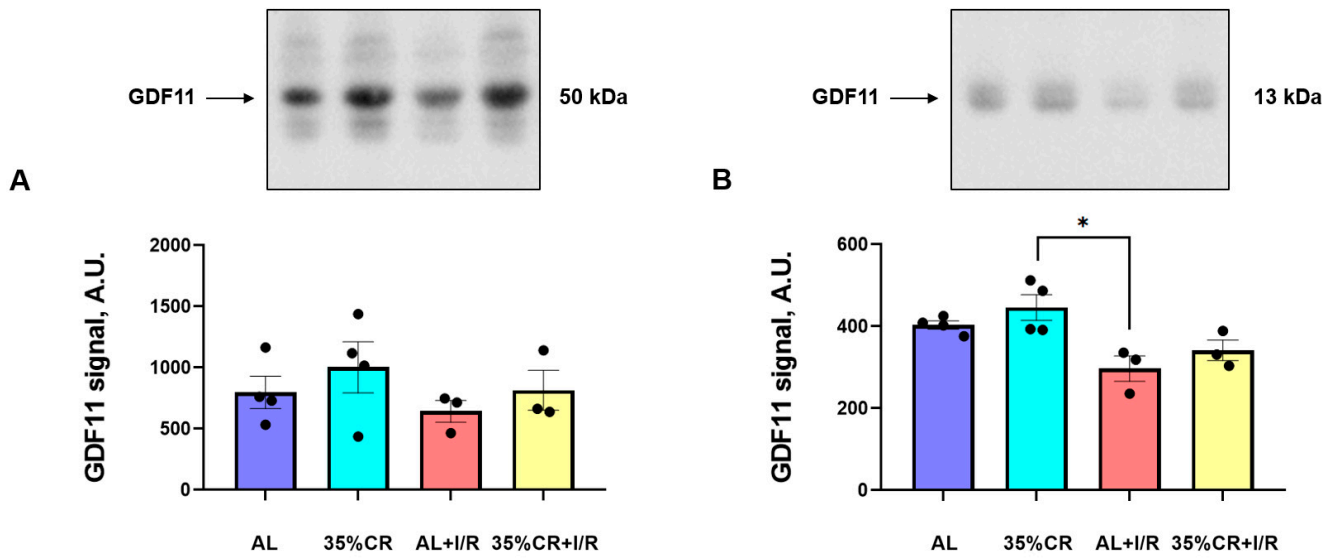

**Supplementary Figure S1.** The level of GDF11 in serum. **(A)** The level of precursor form of GDF11 in serum of OXYS rats on 35% CR or AL diet, before and 48 h after renal I/R ( $n = 4$  for AL group,  $n = 4$  for 35% CR group,  $n = 3$  for AL+I/R group,  $n = 3$  for 35% CR+I/R group). **(B)** The level of mature form of GDF11 in serum of OXYS rats on 35% CR or AL diet, before and 48 h after renal I/R ( $n = 4$  for AL group,  $n = 4$  for 35% CR group,  $n = 3$  for AL+I/R group,  $n = 3$  for 35% CR+I/R group). \*  $p < 0.05$  (one-way ANOVA).

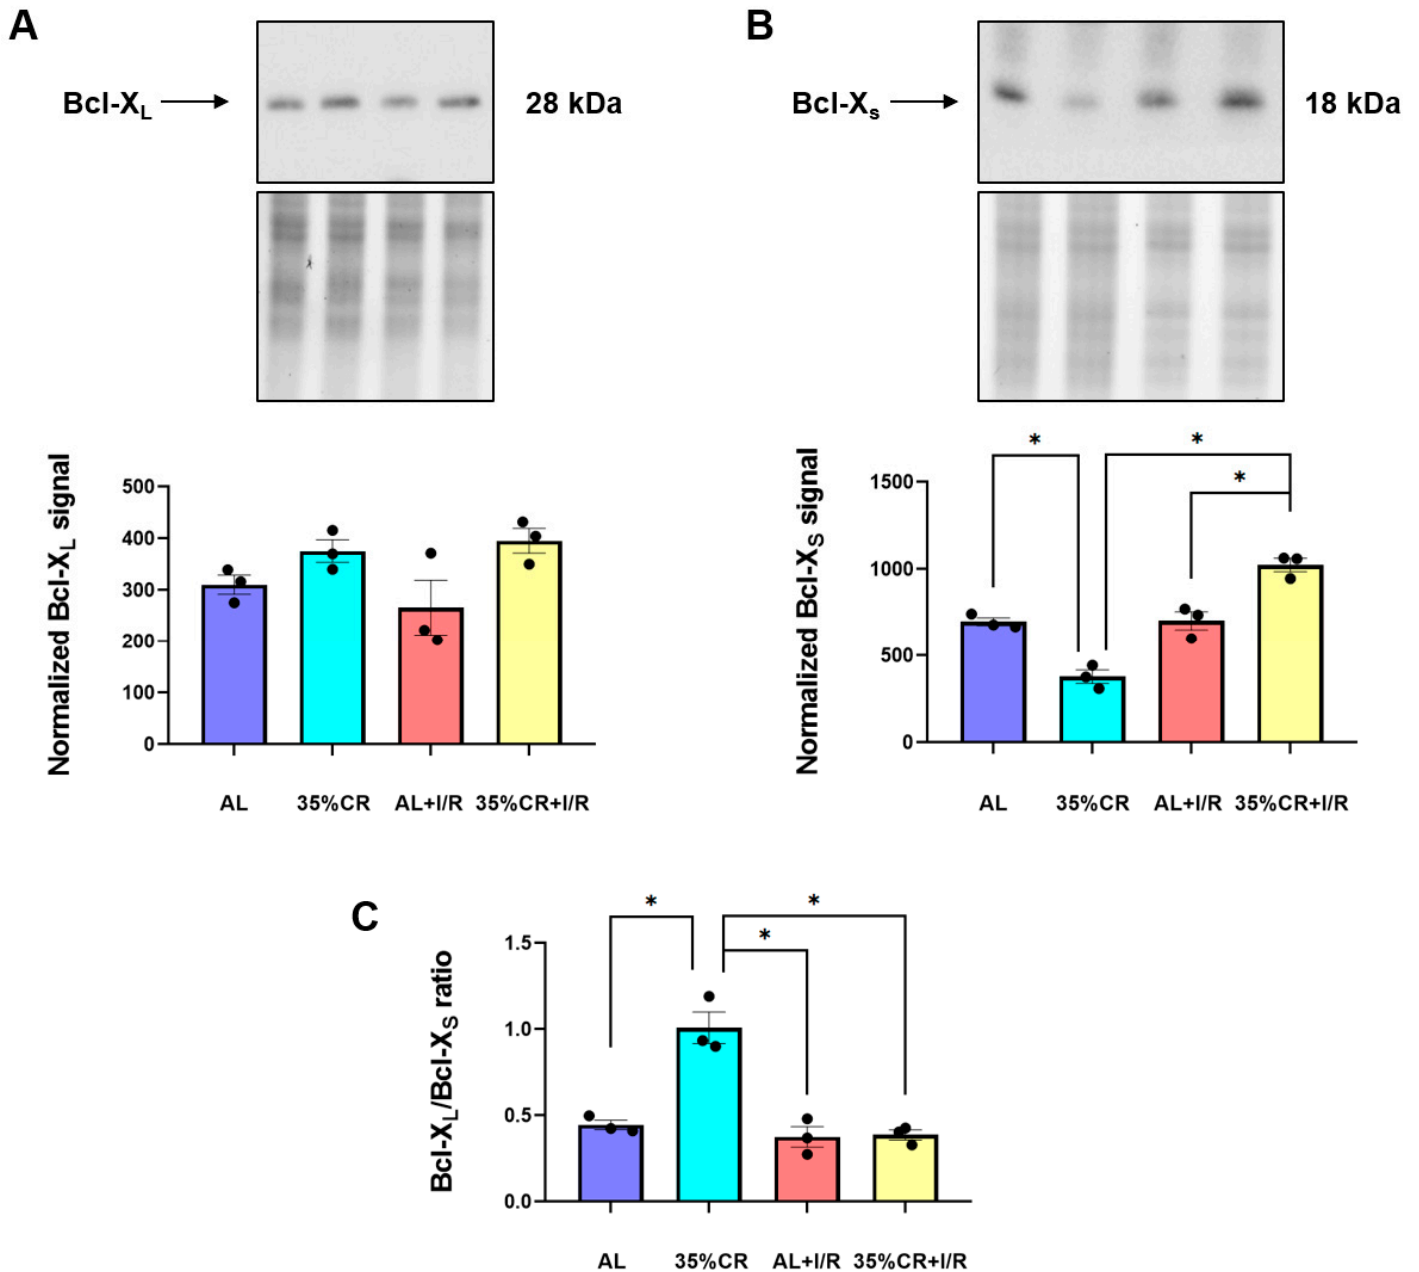

**Supplementary Figure S2.** The level of anti- and pro-apoptotic proteins in kidney homogenates. **(A)** Bcl-X<sub>L</sub> levels in kidney homogenates of OXYs rats on 35% CR or AL diet, before and 48 h after renal I/R ( $n = 3$  for AL group,  $n = 3$  for 35% CR group,  $n = 3$  for AL+I/R group,  $n = 3$  for 35% CR+I/R group). **(B)** Bcl-X<sub>s</sub> levels in kidney homogenates of OXYs rats on 35% CR or AL diet, before and 48 h after renal I/R ( $n = 3$  for AL group,  $n = 3$  for 35% CR group,  $n = 3$  for AL+I/R group,  $n = 3$  for 35% CR+I/R group). **(C)** Bcl-X<sub>L</sub>/Bcl-X<sub>s</sub> ratio in kidney homogenates of OXYs rats on 35% CR or AL diet, before and 48 h after renal I/R ( $n = 3$  for AL group,  $n = 3$  for 35% CR group,  $n = 3$  for AL+I/R group,  $n = 3$  for 35% CR+I/R group). Below the blot image of the target protein, the corresponding total protein loading estimated by Stain-free imaging technique is presented. \*  $p < 0.05$  (one-way ANOVA).

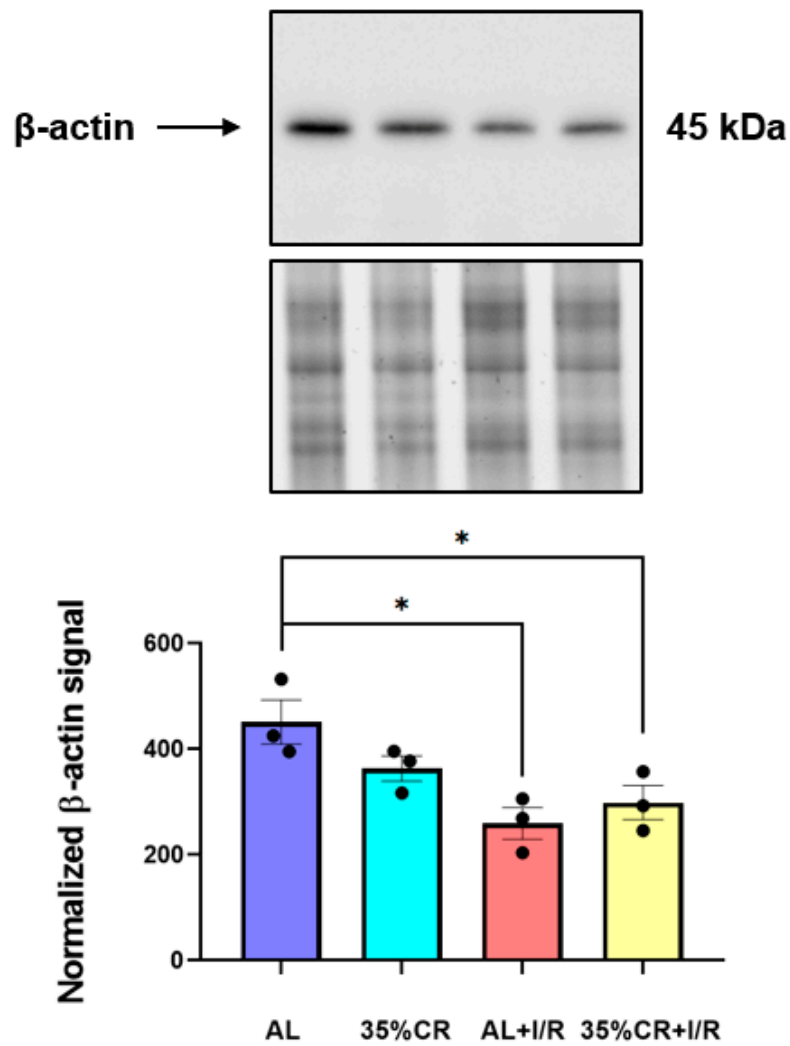

**Supplementary Figure S3.** The level of housekeeping protein  $\beta$ -actin in kidney homogenates of OXYS rats on 35% CR or AL diet, before and 48 h after renal I/R ( $n = 3$  for AL group,  $n = 3$  for 35% CR group,  $n = 3$  for AL+I/R group,  $n = 3$  for 35% CR+I/R group). Below the blot image of the target protein, the corresponding total protein loading estimated by Stain-free imaging technique is presented. \*  $p < 0.05$  (one-way ANOVA).

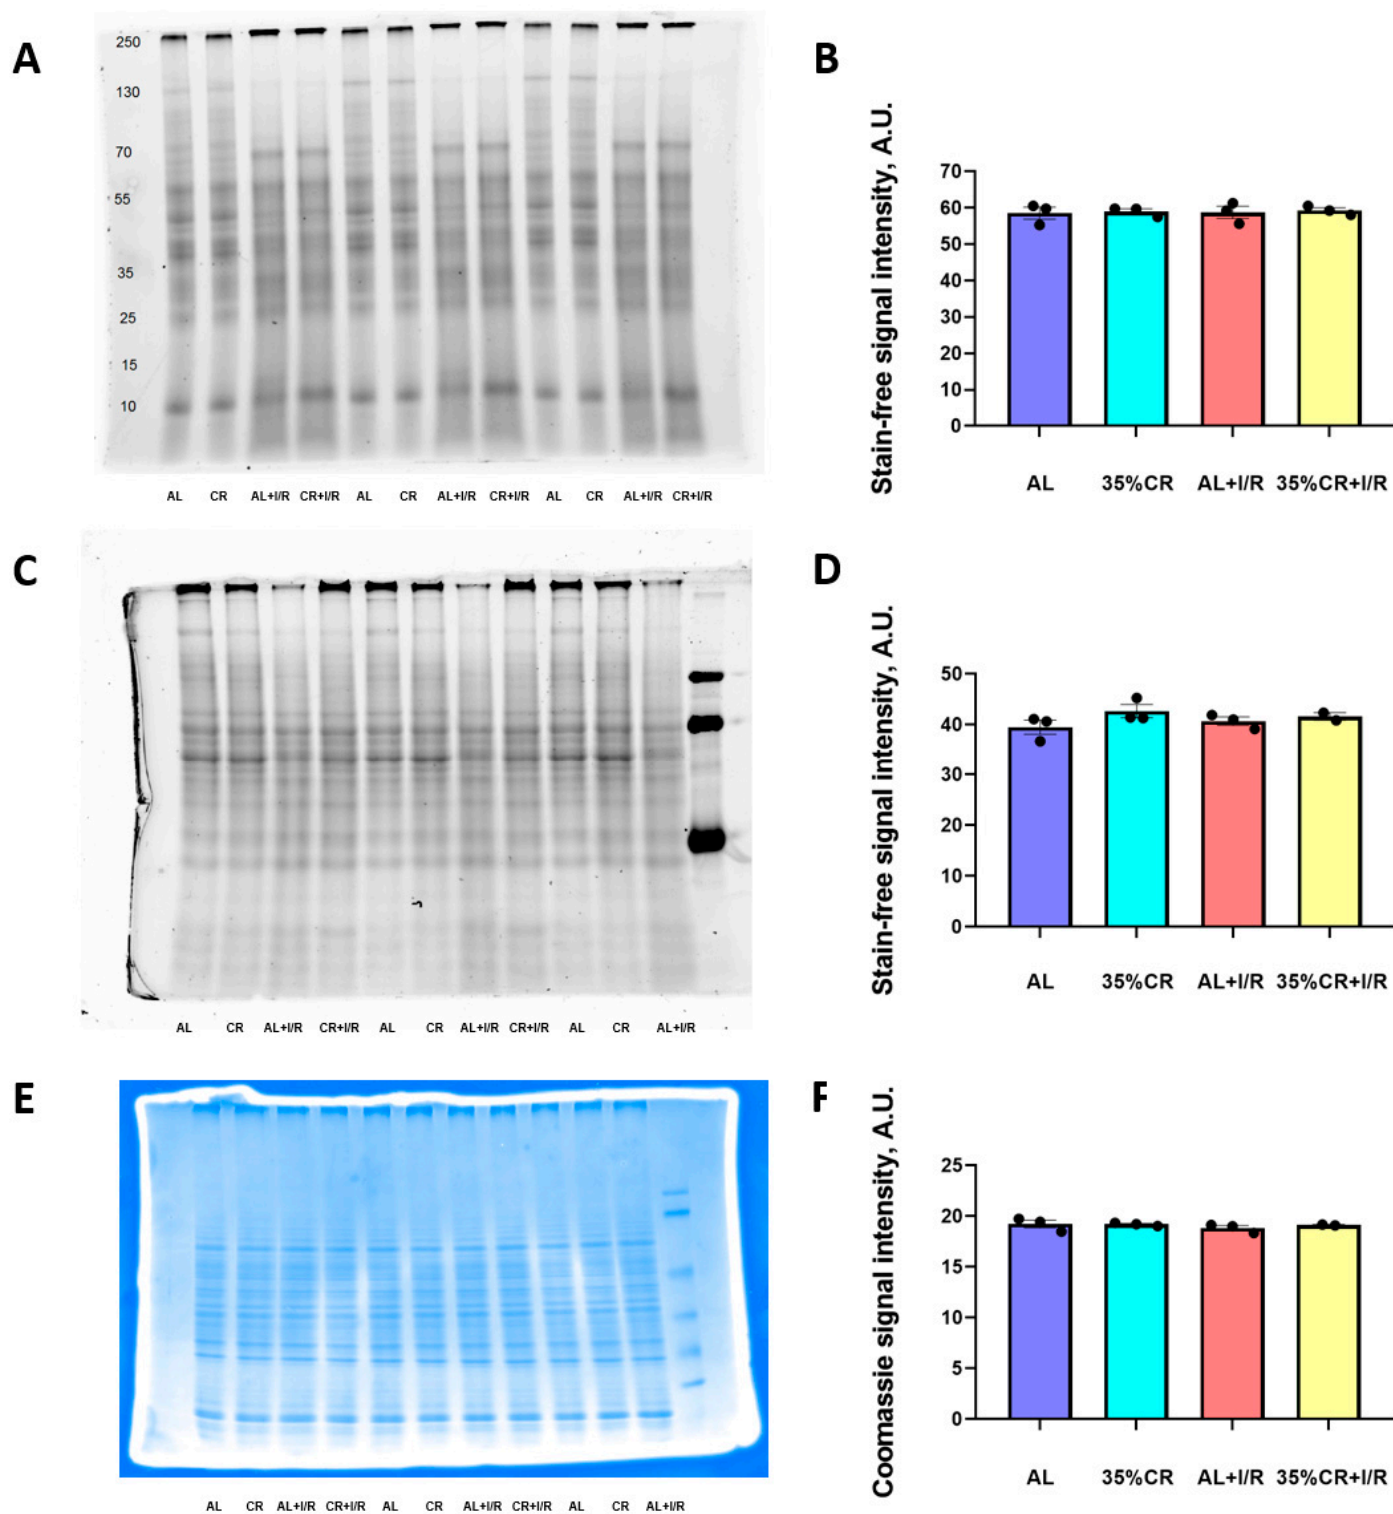

**Supplementary Figure S4.** Total protein normalization. (A,B) The example of Stain-free imaging of kidney homogenate samples ( $n = 3$  for AL group,  $n = 3$  for 35% CR group,  $n = 3$  for AL+I/R group,  $n = 3$  for 35% CR+I/R group). (C,D) The example of Stain-free imaging of isolated mitochondria samples ( $n = 3$  for AL group,  $n = 3$  for 35% CR group,  $n = 3$  for AL+I/R group,  $n = 2$  for 35% CR+I/R group). (E,F) Coomassie staining of kidney homogenate samples ( $n = 3$  for AL group,  $n = 3$  for 35% CR group,  $n = 3$  for AL+I/R group,  $n = 2$  for 35% CR+I/R group).

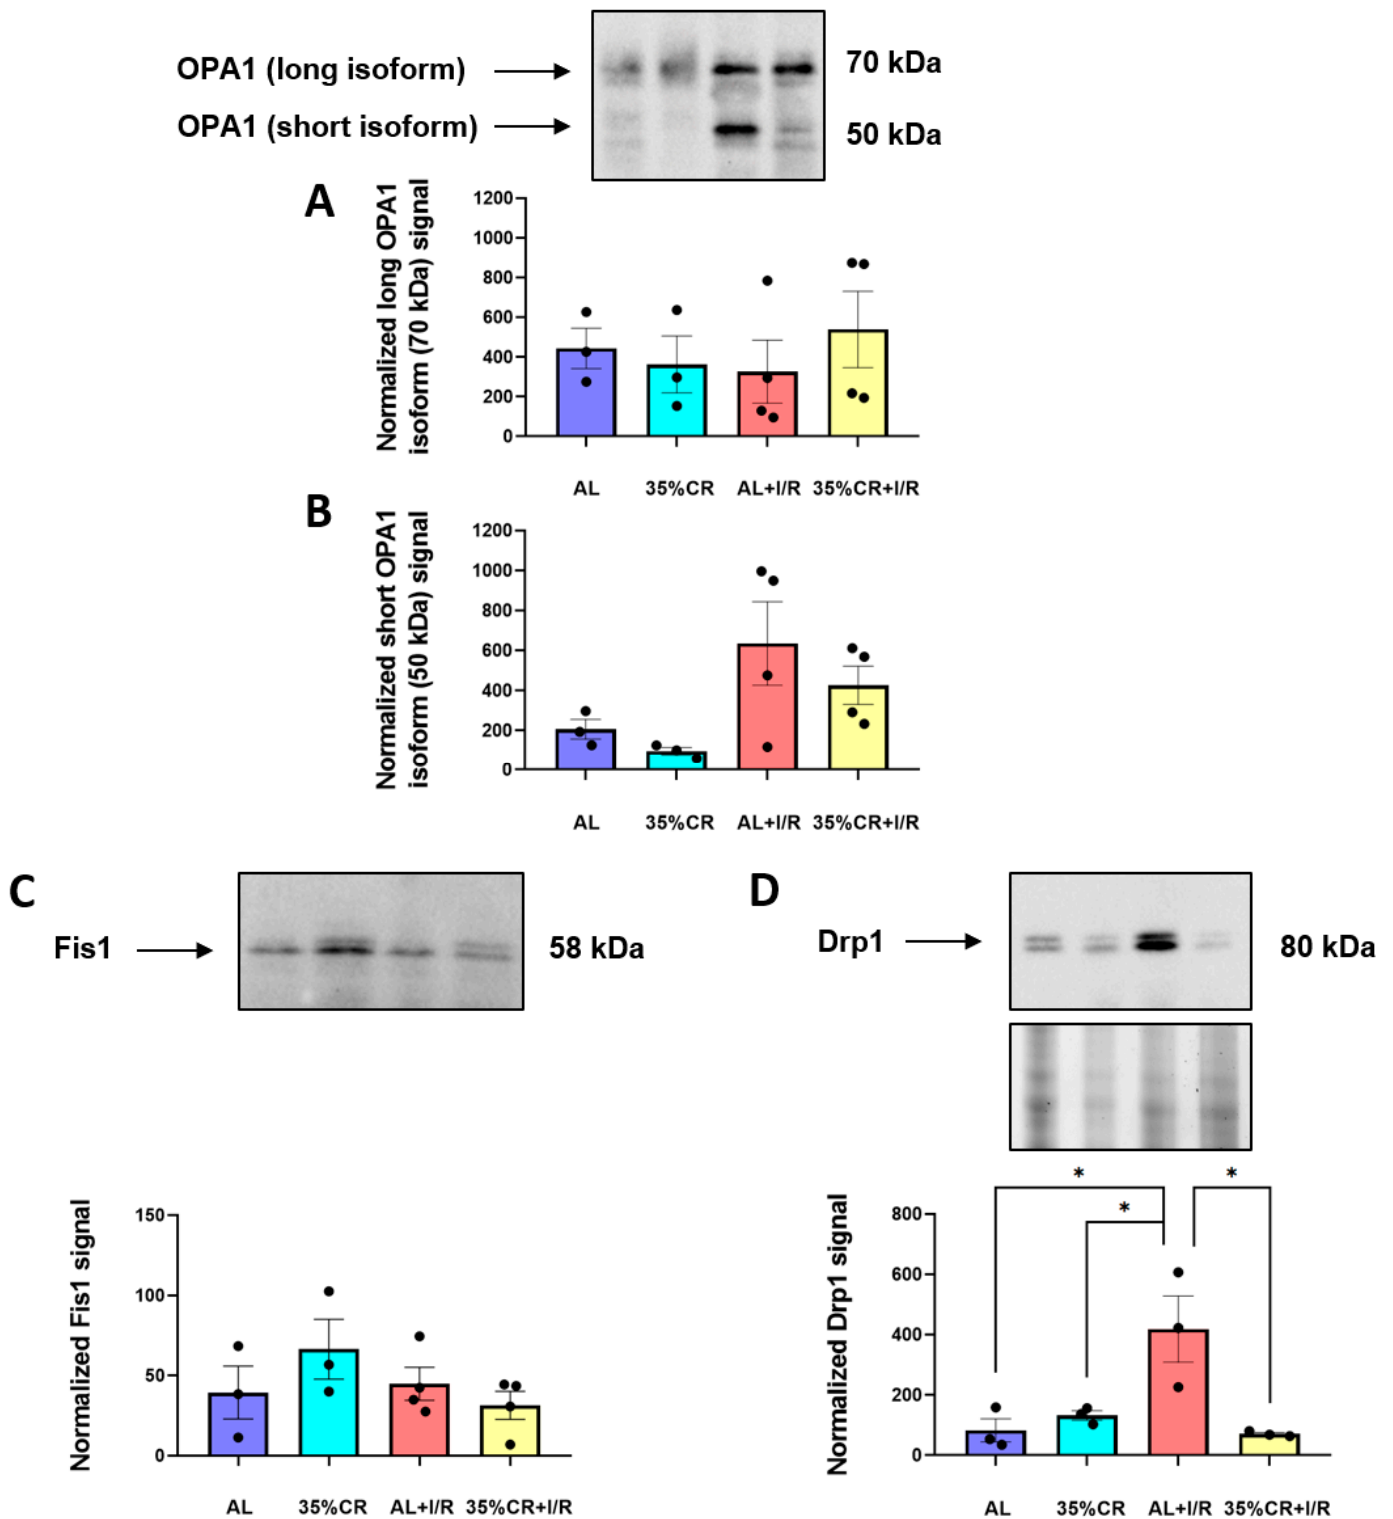

**Supplementary Figure S5.** The level of proteins participating in mitochondrial dynamics. **(A)** The level of long OPA1 isoform in kidney homogenates of intact OXYS rats and 48 h after renal I/R, in OXYS rats kept on AL or CR diet ( $n = 3$  for AL group,  $n = 3$  for 35% CR group,  $n = 4$  for AL+I/R group,  $n = 4$  for 35% CR+I/R group). **(B)** The level of short OPA1 isoform in kidney homogenates of intact OXYS rats and 48 h after renal I/R, in OXYS rats kept on AL or CR diet ( $n = 3$  for AL group,  $n = 3$  for 35% CR group,  $n = 4$  for AL+I/R group,  $n = 4$  for 35% CR+I/R group). **(C)** The level of Fis1 in isolated kidney mitochondria of intact OXYS rats and 48 h after renal I/R, in OXYS rats kept on AL or CR diet ( $n = 3$  for AL group,  $n = 3$  for 35% CR group,  $n = 4$  for AL+I/R group,  $n = 4$  for 35% CR+I/R group). **(D)** The level of Drp1 in isolated kidney mitochondria of intact OXYS rats and 48 h after renal I/R, in OXYS rats kept on AL or CR diet ( $n = 3$  for AL group,  $n = 3$  for 35% CR group,  $n = 3$  for AL+I/R group,  $n = 3$  for 35% CR+I/R group). \*  $p < 0.05$  (one-way ANOVA). Below the blot image of the target protein, the corresponding total protein loading estimated by Stain-free imaging technique is presented (D).
